# Supplementary material
Source: MDPI journal article supplement (https://www.mdpi.com/1424-2818/15/4/492)
Supplement: s1 [file s1]

Table S2 The hosts' germination rates and parasitizing situation by laurel dodder.

| Hosts                      | Germination<br>rates (%) | Successfully parasitized<br>by laurel dodder or not |
|----------------------------|--------------------------|-----------------------------------------------------|
| <i>Bidens pilosa</i>       | 94                       | Yes                                                 |
| <i>Chromolaena odorata</i> | 98                       | Yes                                                 |
| <i>Cleome rutidosperma</i> | 95                       | Yes                                                 |
| <i>Dimocarpus longan</i>   | 85                       | No                                                  |
| <i>Mikania micrantha</i>   | 83                       | Yes                                                 |
| <i>Scoparia dulcis</i>     | 81                       | Yes                                                 |
