# Supplementary material
Source: MDPI journal article supplement (https://www.mdpi.com/1424-2818/15/4/492)
Supplement: s1 [file s1]

Archive with 4 entries (4 files):
- Figure S1--The collection geographical range of Cassytha filiformis and its hosts in China.jpg
- Figure S2--The percentage of different host life forms parasitized by Cassytha filiformis in China.pdf
- Table S1.xlsx
- Table S2.pdf
