# Supplementary material
Source: MDPI journal article supplement (https://www.mdpi.com/1424-2818/15/4/492)
Supplement: s1 [file s1 › Table S1.xlsx]

## Sheet: Table S1
Table S1. A summary of the hosts of Cassytha filiformis.
order/family/genus/species	Order	Family	Genus	Species	Type	Locality	Voucher	Collection date	Collection members or Reference
1,1,1,2	Aquifoliales	Aquifoliaceae	Ilex	Ilex asprella	shrub	Guangxi	FCG03	2020. 07	Zhifang Liu, Shifang Zhang
	Aquifoliales	Aquifoliaceae	Ilex	Ilex asprella var. asprella	shrub	Hainan	HK02	2020. 07	Zhifang Liu, Shifang Zhang
1,1,1,1	Asparagales	Asphodelaceae	Dianella	Dianella ensifolia	shrub	Guangxi	/	1992	Li et al., 1992
1,2,11,11	Asterales	Asteraceae	Artemisia	Artemisia argyi	herb	Guangdong	GZ01	2020. 07	Zhifang Liu, Shifang Zhang
	Asterales	Asteraceae	Bidens	Bidens pilosa	herb	Guangdong, Hainan	GZ04	2020.07, 2021.08	Zhifang Liu, Shifang Zhang, Shengzhuo Huang
	Asterales	Asteraceae	Chromolaena	Chromolaena odorata	herb	Hainan	LS01	2021.08	Zhifang Liu, Shifang Zhang, Shengzhuo Huang
	Asterales	Asteraceae	Chrysanthemum	Chrysanthemum indicum	herb	Guangxi	/	1992	Li et al., 1992
	Asterales	Asteraceae	Cirsium	Cirsium lineare	herb	Guangxi	NN01	2020. 07	Zhifang Liu, Shifang Zhang
	Asterales	Asteraceae	Gnaphalium	Gnaphalium sp.	herb	Guangdong, Guangxi	GZ02	2020. 07	Zhifang Liu, Shifang Zhang,Jiachuan Tan, Guangda Tang, Ting Huang
	Asterales	Asteraceae	Inula	Inula sp.	herb	Guangxi	NN03	2020. 07	Zhifang Liu, Shifang Zhang
	Asterales	Asteraceae	Mikania	Mikania micrantha	herb	Guangxi	NN05	2019.06	Zhang et al., 2020
	Asterales	Asteraceae	Senecio	Senecio sp.	herb	Guangdong	GZ11	2020. 07	Zhifang Liu, Shifang Zhang
	Asterales	Asteraceae	Blainvillea	Blainvillea acmella	herb	Guangxi	FCG01	2020. 07	Zhifang Liu, Shifang Zhang
	Asterales	Goodeniaceae	Scaevola	Scaevola sericea	tree	Guangdong, Guangxi, Hainan	GZ12	2021. 08	Zhifang Liu, Shengzhuo Huang
1,1,2,2	Boraginales	Boraginaceae	Carmona	Carmona microphylla	tree	Guangxi	GX02	2020. 07	Zhifang Liu, Shifang Zhang
	Boraginales	Boraginaceae	Tournefortia	Tournefortia argentea	tree	Guangxi	/	1992	Li et al., 1992
1,1,1,1	Brassicales	Cleomaceae	Cleome	Cleome rutidosperma	herb	Guangdong	GZ05	2020.07	Zhifang Liu, Shifang Zhang
1,1,1,1	Caryophyllales	Polygonaceae	Polygonum	Polygonum chinense	herb	Guangdong	SZ02	2020.07	Zhifang Liu, Shifang Zhang
1,2,3,4	Coniferales	Juglandaceae	Engelhardtia	Embelia henryi	tree	Hainan, Guangdong	HK04	2020.07	Zhifang Liu, Shengzhuo Huang
	Coniferales	Juglandaceae	Engelhardtia	Engelhardtia roxburghiana	tree	Guangxi, Yunnan	NN08	2020.07	Shifang Zhang, Lang Li
	Coniferales	Pinaceae	Keteleeria	Keteleeria fortunei	tree	Zhejiang	ZJ02	2020. 08	Zhifang Liu, Shifang Zhang,Jiachuan Tan
	Coniferales	Pinaceae	Pinus	Pinus massoniana	tree	Guangxi	/	1992	Li et al., 1992
1,1,1,1	Cornales	Cornaceae	Dendrotrophe	Dendrotrophe varians	tree	Guangdong	GZ09	2020.07	Zhifang Liu, Shifang Zhang,Jiachuan Tan
1,1,1,1	Dipsacales	Adoxaceae	Viburnum	Viburnum fordiae	shrub	Guangxi	NN07	2020.07	Zhifang Liu, Shifang Zhang
1,7,10,14	Ericales	Balsaminaceae	Impatiens	Impatiens siculifer	herb	Guangxi	FCG08	2019.07	Zhifang Liu, Shifang Zhang
	Ericales	Pentaphylacaceae	Eurya	Eurya chinensis	shrub	Guangdong	GD02	2020.07	Zhifang Liu, Shifang Zhang, Jiachuan Tan
	Ericales	Pentaphylacaceae	Eurya	Eurya groffii	shrub	Guangdong	GD09	2020.07	Zhifang Liu, Shifang Zhang, Jiachuan Tan
	Ericales	Pentaphylacaceae	Eurya	Eurya nitida	shrub	Guangxi	NN16	2020.07	Zhifang Liu, Shifang Zhang, Lina Dong
	Ericales	Pentaphylacaceae	Eurya	Eurya trichocarpa	shrub	Guangxi	NN18	2020.07	Zhifang Liu, Shifang Zhang, Lina Dong
	Ericales	Primulaceae	Maesa	Maesa japonica	shrub	Guangxi	/	1992	Li et al., 1992
	Ericales	Sapotaceae	Chrysophyllum	Chrysophyllum lanceolatum var. stellatocarpon	tree	Guangxi	NN20	2020.06	Zhifang Liu, Shifang Zhang, Lina Dong
	Ericales	Styracaceae	Huodendron	Huodendron biaristatum	shrub	Guangxi	FCG06	2020.06	Zhifang Liu, Shifang Zhang, Lina Dong
	Ericales	Styracaceae	Styrax	Styrax faberi	tree	Guangxi	FCG02	2020.06	Zhifang Liu, Shifang Zhang, Jiachuan Tan, Guangda Tang, Ting Huang
	Ericales	Symplocaceae	Symplocos	Symplocos sp.	shrub	Guangdong	GD06	2020.07	Zhifang Liu, Shifang Zhang, Jiachuan Tan, Guangda Tang, Ting Huang
	Ericales	Theaceae	Camellia	Camellia drupifera	shrub	Guangxi	NN16	2020.07	Zhifang Liu, Shifang Zhang, Lina Dong
	Ericales	Theaceae	Camellia	Camellia oleifera	tree	Guangdong	GZ13	20219.1	Zhifang Liu, Shifang Zhang, Jiachuan Tan, Guangda Tang, Ting Huang
	Ericales	Theaceae	Schima	Schima superba	tree	Guangdong	M60	2019.07	Zhang et al., 2020
1,5,12,13	Fagales	Fabaceae	Dalbergia	Dalbergia obtusifolia	tree	Guangxi	FCG09	2020.08	Zhifang Liu, Shifang Zhang, Lina Dong
	Fagales	Fabaceae	Flemingia	Flemingia macrophylla	shrub	Guangxi	FCG10	2020.06	Zhifang Liu, Lina Dong
	Fagales	Fabaceae	Lespedeza	Lespedeza thunbergii subsp. formosa	shrub	Guangxi	FCG11	2020.06	Zhifang Liu, Lina Dong
	Fagales	Fabaceae	Sindora	Sindora tonkinensis	tree	Guangxi	/	1992	Li et al., 1992
	Fagales	Fabaceae	Uraria	Uraria sp.	herb	Guangxi	/	1992	Li et al., 1992
	Fagales	Casuarinaceae	Casuarina	Casuarina equisetifolia	tree	Guangxi	/	1992	Li et al., 1992
	Fagales	Fabaceae	Acacia	Acacia mangium	tree	Guangdong, Hainan	M48	2019.07, 2021.07	Zhifang Liu, Shifang Zhang, Shengzhuo Huang,Jiachuan Tan, Guangda Tang, Ting Huang
	Fagales	Fabaceae	Calliandra	Calliandra haematocephala	shrub	Guangdong	NSZ03	2020.07, 2021.08	Zhifang Liu, Shifang Zhang, Shengzhuo Huang,Jiachuan Tan, Guangda Tang, Ting Huang
	Fagales	Fagaceae	Castanea	Castanea henryi	tree	Hainan, Yunnan	HK01	2020.08	Shifang Zhang, Lang Li, Jianlin Hu
	Fagales	Fagaceae	Castanopsis	Castanopsis fargesii	tree	Guangxi	GX16	2020.08	Zhifang Liu, Lina Dong
	Fagales	Fagaceae	Quercus	Quercus fabri	tree	Guangxi	GX20	2020.08	Zhifang Liu, Lina Dong
	Fagales	Juglandaceae	Engelhardia	Engelhardia spicata	tree	Guangxi	GX18	2020.08	Zhifang Liu, Lina Dong
	Fagales	Taxodiaceae	Cunninghamia	Cunninghamia lanceolata	shrub	Guangxi	NN18	2019.07	Zhifang Liu, Lina Dong
1,1,1,1	Ferns	Blechnaceae	Blechnopsis	Blechnopsis orientalis	herb	Guangxi	GX17	2019.07	Zhifang Liu, Lina Dong
1,3,12,17	Gentianales	Apocynaceae	Cryptolepis	Cryptolepis buchananii	liana	Guangdong	ZF01	2020.08	Zhifang Liu, Shifang Zhang, Jiachuan Tan, Guangda Tang, Ting Huang
	Gentianales	Apocynaceae	Beaumontia	Beaumontia pitardii	liana	Guangxi	NN17	2020.08	Zhifang Liu, Lina Dong
	Gentianales	Apocynaceae	Catharanthus	Catharanthus roseus	shrub	Guangdong	ZF04	2020.08	Zhifang Liu, Shifang Zhang, Jiachuan Tan, Guangda Tang, Ting Huang
	Gentianales	Apocynaceae	Streptocaulon	Streptocaulon juventas	liana	Guangxi	NN20	2020.08	Zhifang Liu, Lina Dong
	Gentianales	Apocynaceae	Strophanthus	Strophanthus divaricatus	shrub	Guangdong	ZF02	2020.08	Zhifang Liu, Shifang Zhang, Jiachuan Tan, Guangda Tang, Ting Huang
	Gentianales	Rubiaceae	Psychotria	Psychotria asiatica	shrub	Guangdong	CP	2019.06	Zhang et al., 2020
	Gentianales	Rubiaceae	Canthium	Canthium simile	shrub	Guangxi	ZF04	2020.08	Zhifang Liu, Lina Dong
	Gentianales	Rubiaceae	Hedyotis	Hedyotis auricularia	herb	Guangxi	ZF11	2020.08	Zhifang Liu, Lina Dong
	Gentianales	Rubiaceae	Hedyotis	Hedyotis consanguinea	herb	Guangxi	ZF05	2020.08	Zhifang Liu, Lina Dong
	Gentianales	Rubiaceae	Hedyotis	Hedyotis hedyotidea	shrub	Guangdong	ZF03	2020.08	Zhifang Liu, Shifang Zhang, Jiachuan Tan, Guangda Tang, Ting Huang
	Gentianales	Rubiaceae	Morinda	Morinda umbellata subsp. obovata	liana	Guangxi	GX10	2020.07	Zhifang Liu, Lina Dong
	Gentianales	Rubiaceae	Mussaenda	Mussaenda pubescens	shrub	Guangxi	NN19	2020.08	Zhifang Liu, Lina Dong
	Gentianales	Rubiaceae	Mussaenda	Mussaenda sp.	tree	Guangxi	FCG12	2020.08	Zhifang Liu, Lina Dong
	Gentianales	Rubiaceae	Paederia	Paederia foetida	liana	Hainan	HK05	2020.08	Zhifang Liu, Shifang Zhang, Shengzhuo Huang,Jiachuan Tan, Guangda Tang, Ting Huang
	Gentianales	Rubiaceae	Wendlandia	Wendlandia aberrans	shrub	Yunnan	LC01	2020.08	Zhifang Liu, Shifang Zhang,Jiachuan Tan
	Gentianales	Rubiaceae	Wendlandia	Wendlandia pingpienensis	shrub	Guangxi, Guangdong	GX19	2020.07	Zhifang Liu, Shifang Zhang, Jiachuan Tan, Guangda Tang, Ting Huang
	Gentianales	Rubiaceae	Wendlandia	Wendlandia uvariifolia	tree	Guangdong	GD08	2020.08	Zhifang Liu, Shifang Zhang, Jiachuan Tan, Guangda Tang, Ting Huang
1,1,1,1	Hypericaceae	Asclepiadaceae	Cratoxylum	Cratoxylum cochinchinense	shrub	Guangxi	GX21	2020.07	Zhifang Liu, Shifang Zhang
1,5,9,9	Lamiales	Bignoniaceae	Oroxylum	Oroxylum indicum	tree	Guangxi, Guangdong	NN23	2020.08	Zhifang Liu, Shifang Zhang, Jiachuan Tan, Guangda Tang, Ting Huang
	Lamiales	Lamiaceae	Caryopteris	Caryopteris incana	shrub	Guangdong	SZ05	2020.08	Zhifang Liu, Shifang Zhang, Jiachuan Tan, Guangda Tang, Ting Huang
	Lamiales	Lamiaceae	Clerodendrum	Clerodendrum cyrtophyllum	tree	Guangxi	GX22	2020.07	Zhifang Liu, Lina Dong
	Lamiales	Lamiaceae	Phlomoides	Phlomoides umbrosa	herb	Guangxi	NN22	2020.08	Zhifang Liu, Shifang Zhang
	Lamiales	Lamiaceae	Vitex	Vitex negundo	shrub	Guangdong	SZ01	2020.08	Zhifang Liu, Shifang Zhang, Jiachuan Tan, Guangda Tang, Ting Huang
	Lamiales	Plantaginaceae	Scoparia	Scoparia dulcis	herb	Guangdong	NSZ02	2020.08	Zhifang Liu, Shifang Zhang, Jiachuan Tan, Guangda Tang, Ting Huang
	Lamiales	Verbenaceae	Lantana	Lantana camara	shrub	Hainan	WC03	2020.08	Zhifang Liu, Shifang Zhang, Shengzhuo Huang,Jiachuan Tan, Guangda Tang, Ting Huang
	Lamiales	Oleaceae	Ligustrum	Ligustrum sinense	shrub	Guangxi	GX23	2020.07	Zhifang Liu, Shifang Zhang
1,1,6,11	Laurales	Lauraceae	Actinodaphne	Actinodaphne pilosa	tree	Guangdong	GD01	2020.08	Zhifang Liu, Shifang Zhang, Jiachuan Tan, Guangda Tang, Ting Huang
	Laurales	Lauraceae	Beilschmiedia	Beilschmiedia percoriacea	tree	Guangdong	GZ03	2020.08	Zhifang Liu, Shifang Zhang, Jiachuan Tan, Guangda Tang, Ting Huang
	Laurales	Lauraceae	Cinnamomum	Cinnamomum burmanni	tree	Guangxi	GX24	2020.07	Zhifang Liu, Shifang Zhang
	Laurales	Lauraceae	Cinnamomum	Cinnamomum camphora	tree	Guangxi, Guangdong	GX12	2020.07	Zhifang Liu, Shifang Zhang, Jiachuan Tan, Guangda Tang, Ting Huang
	Laurales	Lauraceae	Lindera	Lindera aggregata	tree	Guangxi	NN21	2020.08	Zhifang Liu, Shifang Zhang
	Laurales	Lauraceae	Lindera	Lindera angustifolia	tree	Guangxi	NN23	2020.08	Zhifang Liu, Lina Dong
	Laurales	Lauraceae	Litsea	Litsea cubeba	tree	Guangxi	FCG16	2020.08	Zhifang Liu, Shifang Zhang
	Laurales	Lauraceae	Litsea	Litsea glutinosa	tree	Guangdong, Guangxi	GD07	2021.12	Zhifang Liu, Shifang Zhang, Jiachuan Tan, Guangda Tang, Ting Huang
	Laurales	Lauraceae	Litsea	Litsea rotundifolia	tree	Guangxi, Yunnan	CaT	2019.08	Zhang et al., 2020
	Laurales	Lauraceae	Litsea	Litsea rotundifolia var. oblongifolia	tree	Guangdong	GD03	2021.11	Zhifang Liu, Shifang Zhang, Jiachuan Tan, Guangda Tang, Ting Huang
	Laurales	Lauraceae	Persea	Persea americana	tree	Guangdong	ZJ03	2020.07	Zhifang Liu, Shifang Zhang, Jiachuan Tan, Guangda Tang, Ting Huang
1,2,2,2	Liliales	Liliaceae	Dianella	Desmos chinensis	herb	Guangdong	GZ07	2021.11	Zhifang Liu, Shifang Zhang, Jiachuan Tan, Guangda Tang, Ting Huang
	Liliales	Smilacaceae	Smilax	Smilax china	shrub	Guangxi	NN24	2020.07	Zhifang Liu, Shifang Zhang
1,2,2,2	Magnoliales	Magnoliaceae	Michelia	Michelia macclurei	tree	Guangdong	GZ10	2021.11	Zhifang Liu, Shifang Zhang, Jiachuan Tan, Guangda Tang, Ting Huang
	Magnoliales	Myristicaceae	Myristica	Myristica fragrans	tree	Guangxi	NN27	2020.07	Zhifang Liu, Shifang Zhang
1,3,14,22	Malpighiales	Euphorbiaceae	Triadica	Triadica cochinchinensis	tree	Guangxi	NN25	2020.07	Zhifang Liu, Shifang Zhang
	Malpighiales	Euphorbiaceae	Mallotus	Mallotus apelta	tree	Guangdong	GZ14	2021.11	Zhifang Liu, Shifang Zhang
	Malpighiales	Euphorbiaceae	Mallotus	Mallotus barbatus	tree	Guangxi	GX27	2020.07	Zhifang Liu, Lina Dong
	Malpighiales	Euphorbiaceae	Mallotus	Mallotus paniculatus	tree	Guangxi	NN26	2020.07	Zhifang Liu, Shifang Zhang
	Malpighiales	Euphorbiaceae	Mallotus	Mallotus philippensis	tree	Guangxi	NN28	2020.07	Zhifang Liu, Shifang Zhang
	Malpighiales	Euphorbiaceae	Mallotus	Mallotus repandus	shrub	Guangdong	GD13	2021.11	Zhifang Liu, Shifang Zhang, Jiachuan Tan, Guangda Tang, Ting Huang
	Malpighiales	Euphorbiaceae	Vernicia	Vernicia fordii	tree	Guangxi	NN29	2020.07	Zhifang Liu, Shifang Zhang
	Malpighiales	Phyllanthaceae	Phyllanthus	Phyllanthus emblica	tree	Guangxi	FCG13	2020.07	Zhifang Liu, Shifang Zhang
	Malpighiales	Phyllanthaceae	Antidesma	Antidesma bunius	tree	Fujian, Guangxi	XM01	2020.07	Zhifang Liu, Shifang Zhang
	Malpighiales	Phyllanthaceae	Antidesma	Antidesma ghaesembilla	tree	Guangxi, Yunnan	FCG14	2020.07	Zhifang Liu, Shifang Zhang,Jiachuan Tan
	Malpighiales	Phyllanthaceae	Aporosa	Aporosa sp.	tree	Guangxi	CaM	2019.07	Zhang et al., 2020
	Malpighiales	Phyllanthaceae	Breynia	Breynia fruticosa	shrub	Guangxi	FCG17	2020.07	Zhifang Liu, Shifang Zhang, Hui Ma
	Malpighiales	Phyllanthaceae	Bridelia	Bridelia balansae	tree	Hainan	WC02	2020.07	Zhifang Liu, Shifang Zhang, Shengzhuo Huang,Jiachuan Tan, Guangda Tang, Ting Huang
	Malpighiales	Phyllanthaceae	Bridelia	Bridelia tomentosa	tree	Guangdong	M39	2019.06	Zhang et al., 2020
	Malpighiales	Phyllanthaceae	Flueggea	Flueggea virosa	shrub	Guangxi	GX26	2020.07	Zhifang Liu, Shifang Zhang, Hui Ma
	Malpighiales	Phyllanthaceae	Glochidion	Glochidion coccineum	shrub	Guangdong	ZH01	2020.07	Zhifang Liu, Shifang Zhang, Jiachuan Tan, Guangda Tang, Ting Huang
	Malpighiales	Phyllanthaceae	Glochidion	Glochidion wrightii	shrub	Guangxi	FCG18	2020.07	Zhifang Liu, Shifang Zhang
	Malpighiales	Phyllanthaceae	Aporosa	Aporosa dioica	tree	Guangdong, Guangxi, Hainan, Yunnan	M21	2019.07-2021.08	Zhifang Liu, Shifang Zhang, Jiachuan Tan, Guangda Tang, Ting Huang
	Malpighiales	Salicaceae	Salix	Salix myrtillacea	shrub	Guangdong, Guangxi	M6	2019.06	Zhifang Liu, Shifang Zhang
	Malpighiales	Salicaceae	Xylosma	Xylosma congesta	shrub	Guangxi	GX25	2020.07	Zhifang Liu, Shifang Zhang
	Malpighiales	Salicaceae	Xylosma	Xylosma controversa	tree	Guangxi	/	1992	Li et al., 1992
1,2,6,9	Malvales	Malvaceae	Bombax	Bombax ceiba	tree	Hainan	WC01	2020.07	Zhifang Liu, Shifang Zhang
	Malvales	Malvaceae	Grewia	Grewia hirsuta	shrub	Guangxi	FCG22	2020.07	Zhifang Liu, Shifang Zhang
	Malvales	Malvaceae	Grewia	Grewia tiliifolia	tree	Guangxi	FCG30	2020.07	Zhifang Liu, Shifang Zhang
	Malvales	Malvaceae	Helicteres	Helicteres angustifolia	shrub	Guangxi	/	1992	Li et al., 1992
	Malvales	Malvaceae	Helicteres	Helicteres glabriuscula	shrub	Guangxi	NN30	2020.07	Zhifang Liu, Shifang Zhang
	Malvales	Malvaceae	Helicteres	Helicteres lanceolata	shrub	Guangdong	GD12	2020.07	Zhifang Liu, Shifang Zhang, Jiachuan Tan, Guangda Tang, Ting Huang
	Malvales	Malvaceae	Hibiscus	Hibiscus rosa-sinensis	shrub	Guangxi	GX11	2020.07	Zhifang Liu, Shifang Zhang
	Malvales	Malvaceae	Urena	Urena lobata	shrub	Guangxi	GX15	2020.07	Zhifang Liu, Shifang Zhang
	Malvales	Thymelaeaceae	Aquilaria	Aquilaria sinensis	tree	Guangxi	GX09	2020.07	Zhifang Liu, Shifang Zhang
1,2,9,13	Myrtales	Myrtaceae	Metrosideros	Metrosideros polymorpha	tree	Guangdong	SZ07	2020.07	Zhifang Liu, Shifang Zhang, Jiachuan Tan, Guangda Tang, Ting Huang
	Myrtales	Melastomataceae	Melastoma	Melastoma candidum	shrub	Hainan	GX08	2020.07	Zhifang Liu, Shifang Zhang, Shengzhuo Huang,Jiachuan Tan, Guangda Tang, Ting Huang
	Myrtales	Melastomataceae	Melastoma	Melastoma malabathricum	shrub	Guangxi	N20B	2019.07	Zhang et al., 2020
	Myrtales	Melastomataceae	Melastoma	Melastoma sanguineum	shrub	Guangdong	M13	2019.07	Zhang et al., 2020
	Myrtales	Melastomataceae	Memecylon	Memecylon ligustrifolium	shrub	Guangxi	GX07	2020.07	Zhifang Liu, Shifang Zhang
	Myrtales	Myrtaceae	Baeckea	Baeckea frutescens	tree	Hainan	LS03	2020.07	Zhifang Liu, Shifang Zhang, Shengzhuo Huang,Jiachuan Tan, Guangda Tang, Ting Huang
	Myrtales	Myrtaceae	Eucalyptus	Eucalyptus robusta	tree	Guangxi	GX05	2020.07	Zhifang Liu, Shifang Zhang
	Myrtales	Myrtaceae	Eugenia	Eugenia aromatica	tree	Guangxi	NN11	2020.07	Zhifang Liu, Shifang Zhang
	Myrtales	Myrtaceae	Psidium	Psidium guajava	shrub	Guangxi	GX06	2020.07	Zhifang Liu, Shifang Zhang
	Myrtales	Myrtaceae	Rhodomyrtus	Rhodomyrtus tomentosa	shrub	Guangxi	NN12	2020.07	Zhifang Liu, Shifang Zhang
	Myrtales	Myrtaceae	Syzygium	Syzygium hainanense	tree	Guangdong	NSZ07	2020.07	Zhifang Liu, Shifang Zhang, Jiachuan Tan, Guangda Tang, Ting Huang
	Myrtales	Myrtaceae	Syzygium	Syzygium jambos	tree	Guangxi, Yunnan	NN06	2020.07	Zhifang Liu, Shifang Zhang
	Myrtales	Myrtaceae	Syzygium	Syzygium sp.	tree	Guangxi	NN04	2020.07	Zhifang Liu, Shifang Zhang
1,1,1,2	Oxalidales	Elaeocarpaceae	Elaeocarpus	Elaeocarpus sylvestris	tree	Guangxi	NN14	2020.07	Zhifang Liu, Shifang Zhang
	Oxalidales	Elaeocarpaceae	Elaeocarpus	Elaeocarpus decipiens	tree	Guangdong	N13B	2019.07	Zhang et al., 2020
1,1,1,1	Pandanales	Pandanaceae	Pandanus	Pandanus sp.	tree	Guangxi	/	1992	Li et al., 1992
1,1,5,6	Poales	Poaceae	Microstegium	Microstegium fasciculatum	herb	Guangdong	NSZ11	2020.07	Zhifang Liu, Shifang Zhang, Jiachuan Tan, Guangda Tang, Ting Huang
	Poales	Poaceae	Setaria	Setaria sp.	herb	Guangxi	/	1992	Li et al., 1992
	Poales	Poaceae	Bambusa	Bambusa multiplex	herb	Guangxi	/	1992	Li et al., 1992
	Poales	Poaceae	Bambusa	Bambusa sp.	herb	Guangxi	/	1992	Li et al., 1992
	Poales	Poaceae	Miscanthus	Miscanthus floridulus	herb	Hainan	HK06	2020.07	Zhifang Liu, Shifang Zhang, Shengzhuo Huang,Jiachuan Tan, Guangda Tang, Ting Huang
	Poales	Poaceae	Thysanolaena	Thysanolaena latifolia	herb	Guangxi	/	1992	Li et al., 1992
1,4,4,5	Polypodiales	Adiantaceae	Adiantum	Adiantum capillus-veneris	herb	Guangdong	NSZ10	2020.07	Zhifang Liu, Shifang Zhang, Jiachuan Tan, Guangda Tang, Ting Huang
	Polypodiales	Gleicheniaceae	Dicranopteris	Dicranopteris linearis	herb	Guangdong	NSZ08	2020.07	Zhifang Liu, Shifang Zhang, Jiachuan Tan, Guangda Tang, Ting Huang
	Polypodiales	Gleicheniaceae	Dicranopteris	Dicranopteris pedata	herb	Guangdong, Guangxi	N9B	2019.07	Zhang et al., 2020
	Polypodiales	Lygodiaceae	Lygodium	Lygodium japonicum	herb	Guangxi	N21B	2019.07	Zhang et al., 2020
	Polypodiales	Pteridaceae	Pteris	Pteris sp.	herb	Guangxi	/	1992	Li et al., 1992
1,2,2,3	Ranunculales	Menispermaceae	Stephania	Stephania longa	herb	Guangdong	NSZ06	2020.07	Zhifang Liu, Shifang Zhang, Jiachuan Tan, Guangda Tang, Ting Huang
	Ranunculales	Menispermaceae	Stephania	Stephania macrantha	liana	Guangdong	M3	2019.07	Zhang et al., 2020
	Ranunculales	Ranunculaceae	Clematis	Clematis armandi	herb	Guangxi	/	1992	Li et al., 1992
1,3,8,10	Rosales	Moraceae	Ficus	Ficus concinna	tree	Guangdong	NSZ05	2020.07	Zhifang Liu, Shifang Zhang, Jiachuan Tan, Guangda Tang, Ting Huang
	Rosales	Moraceae	Ficus	Ficus sp.	tree	Guangxi	N23B	2019.07	Zhang et al., 2020
	Rosales	Moraceae	Maclura	Maclura tricuspidata	shrub	Guangdong	SZ04	2020.07	Zhifang Liu, Shifang Zhang, Jiachuan Tan, Guangda Tang, Ting Huang
	Rosales	Rhamnaceae	Berchemia	Berchemia lineata	shrub	Guangxi	GX04	2020.07	Zhifang Liu, Shifang Zhang
	Rosales	Rhamnaceae	Paliurus	Paliurus hemsleyanus	tree	Guangdong, Guangxi	GD05	2020.07	Zhifang Liu, Shifang Zhang, Jiachuan Tan, Guangda Tang, Ting Huang
	Rosales	Rhamnaceae	Paliurus	Paliurus ramosissimus	shrub	Guangxi	FCG05	2020.07	Zhifang Liu, Shifang Zhang
	Rosales	Rhamnaceae	Rhamnus	Rhamnus crenata	shrub	Guangxi	/	1992	Li et al., 1992
	Rosales	Rhamnaceae	Sageretia	Sageretia thea	shrub	Guangxi	/	1992	Li et al., 1992
	Rosales	Rosaceae	Geum	Geum chiloense	herb	Guangxi	GX03	2020.07	Zhifang Liu, Shifang Zhang
	Rosales	Rosaceae	Rubus	Rubus cochinchinensis	shrub	Guangxi	/	1992	Li et al., 1992
1,1,1,1	Rutales	Rutaceae	Toddalia	Toddalia asiatica	liana	Guangxi	/	1992	Li et al., 1992
1,1,1,1	Santalales	Santalaceae	Dendrotrophe	Dendrotrophe varians	liana	Guangdong	ZJ02	2020.07	Zhifang Liu, Shifang Zhang, Jiachuan Tan, Guangda Tang, Ting Huang
1,5,14,15	Sapindales	Anacardiaceae	Pistacia	Pistacia chinensis	shrub	Guangxi	/	1992	Li et al., 1992
	Sapindales	Anacardiaceae	Mangifera	Mangifera indica	tree	Guangxi	/	1992	Li et al., 1992
	Sapindales	Anacardiaceae	Rhus	Rhus chinensis	tree	Guangdong	GD04	2020.07	Zhifang Liu, Shifang Zhang, Jiachuan Tan, Guangda Tang, Ting Huang
	Sapindales	Anacardiaceae	Toxicodendron	Toxicodendron succedaneum	tree	Guangxi	/	1992	Li et al., 1992
	Sapindales	Meliaceae	Cipadessa	Cipadessa baccifera	tree	Guangdong	ZJ01	2020.07	Zhifang Liu, Shifang Zhang, Jiachuan Tan, Guangda Tang, Ting Huang
	Sapindales	Meliaceae	Melia	Melia azedarach	tree	Guangxi	/	1992	Li et al., 1992
	Sapindales	Rutaceae	Acronychia	Acronychia pedunculata	tree	Guangxi	/	1992	Li et al., 1992
	Sapindales	Rutaceae	Citrus	Citrus reticulata	tree	Guangxi	/	1992	Li et al., 1992
	Sapindales	Rutaceae	Glycosmis	Glycosmis cochinchinensis	tree	Guangdong	GZ08	2020.07	Zhifang Liu, Shifang Zhang, Jiachuan Tan, Guangda Tang, Ting Huang
	Sapindales	Rutaceae	Melicope	Melicope pteleifolia	tree	Guangdong, Guangxi	N3B, M24	2019.07, 2020.08	Zhang et al., 2020
	Sapindales	Rutaceae	Zanthoxylum	Zanthoxylum avicennae	tree	Guangdong, Guangxi, Hainan, Yunnan	MJ02	2021.08	Zhifang Liu, Shifang Zhang, Shengzhuo Huang,Jiachuan Tan, Guangda Tang, Ting Huang
	Sapindales	Rutaceae	Zanthoxylum	Zanthoxylum sp.	tree	Guangdong	GD04	2020.07	Zhifang Liu, Shifang Zhang, Shengzhuo Huang,Jiachuan Tan, Guangda Tang, Ting Huang
	Sapindales	Sapindaceae	Dimocarpus	Dimocarpus longan	tree	Guangxi	/	1992	Li et al., 1992
	Sapindales	Sapindaceae	Litchi	Litchi chinensis	tree	Guangxi, Hainan	GX01	2020.07	Zhifang Liu, Shifang Zhang, Shengzhuo Huang,Jiachuan Tan, Guangda Tang, Ting Huang
	Sapindales	Simaroubaceae	Brucea	Brucea javanica	shrub	Guangdong, Hainan, Yunnan	MJ01	2021.08	Zhifang Liu, Shifang Zhang, Shengzhuo Huang,Jiachuan Tan, Guangda Tang, Ting Huang
1,3,3,3	Saxifragales	Altingiaceae	Liquidambar	Liquidambar formosana	tree	Guangxi	NN17	2020.07	Zhifang Liu, Shifang Zhang
	Saxifragales	Daphniphyllaceae	Daphniphyllum	Daphniphyllum calycinum	shrub	Guangxi	NN15	2020.07	Zhifang Liu, Shifang Zhang
	Saxifragales	Hamamelidaceae	Mytilaria	Mytilaria laosensis	tree	Hainan	LS04	2021.08	Zhifang Liu, Shifang Zhang, Shengzhuo Huang,Jiachuan Tan, Guangda Tang, Ting Huang
1,1,1,1	Solanales	Solanaceae	Atropa	Atropa belladonna	herb	Guangxi	FCG07	2020.07	Zhifang Liu, Shifang Zhang
1,1,1,1	Vitales	Vitaceae	Vitis	Vitis amurensis	liana	Guangxi	NN13	2020.07, 2021.08	Zhifang Liu, Shifang Zhang
