# Supplementary material
Source: MDPI journal article supplement (https://www.mdpi.com/1424-2818/15/4/492)

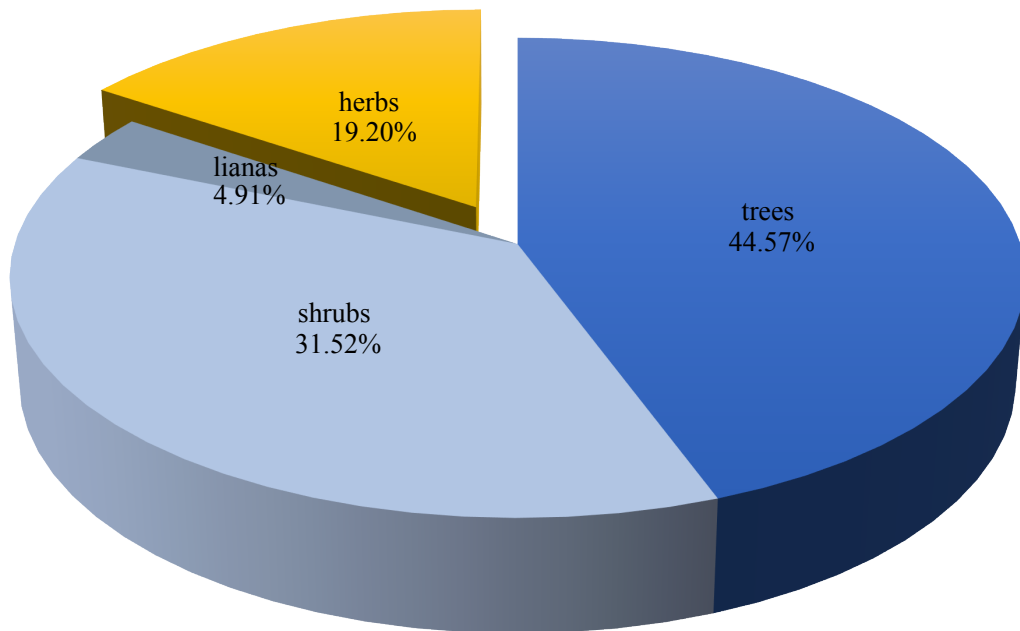

■ trees  
■ shrubs  
■ lianas  
■ herbs

} woody

Supplement: s1 [file s1]

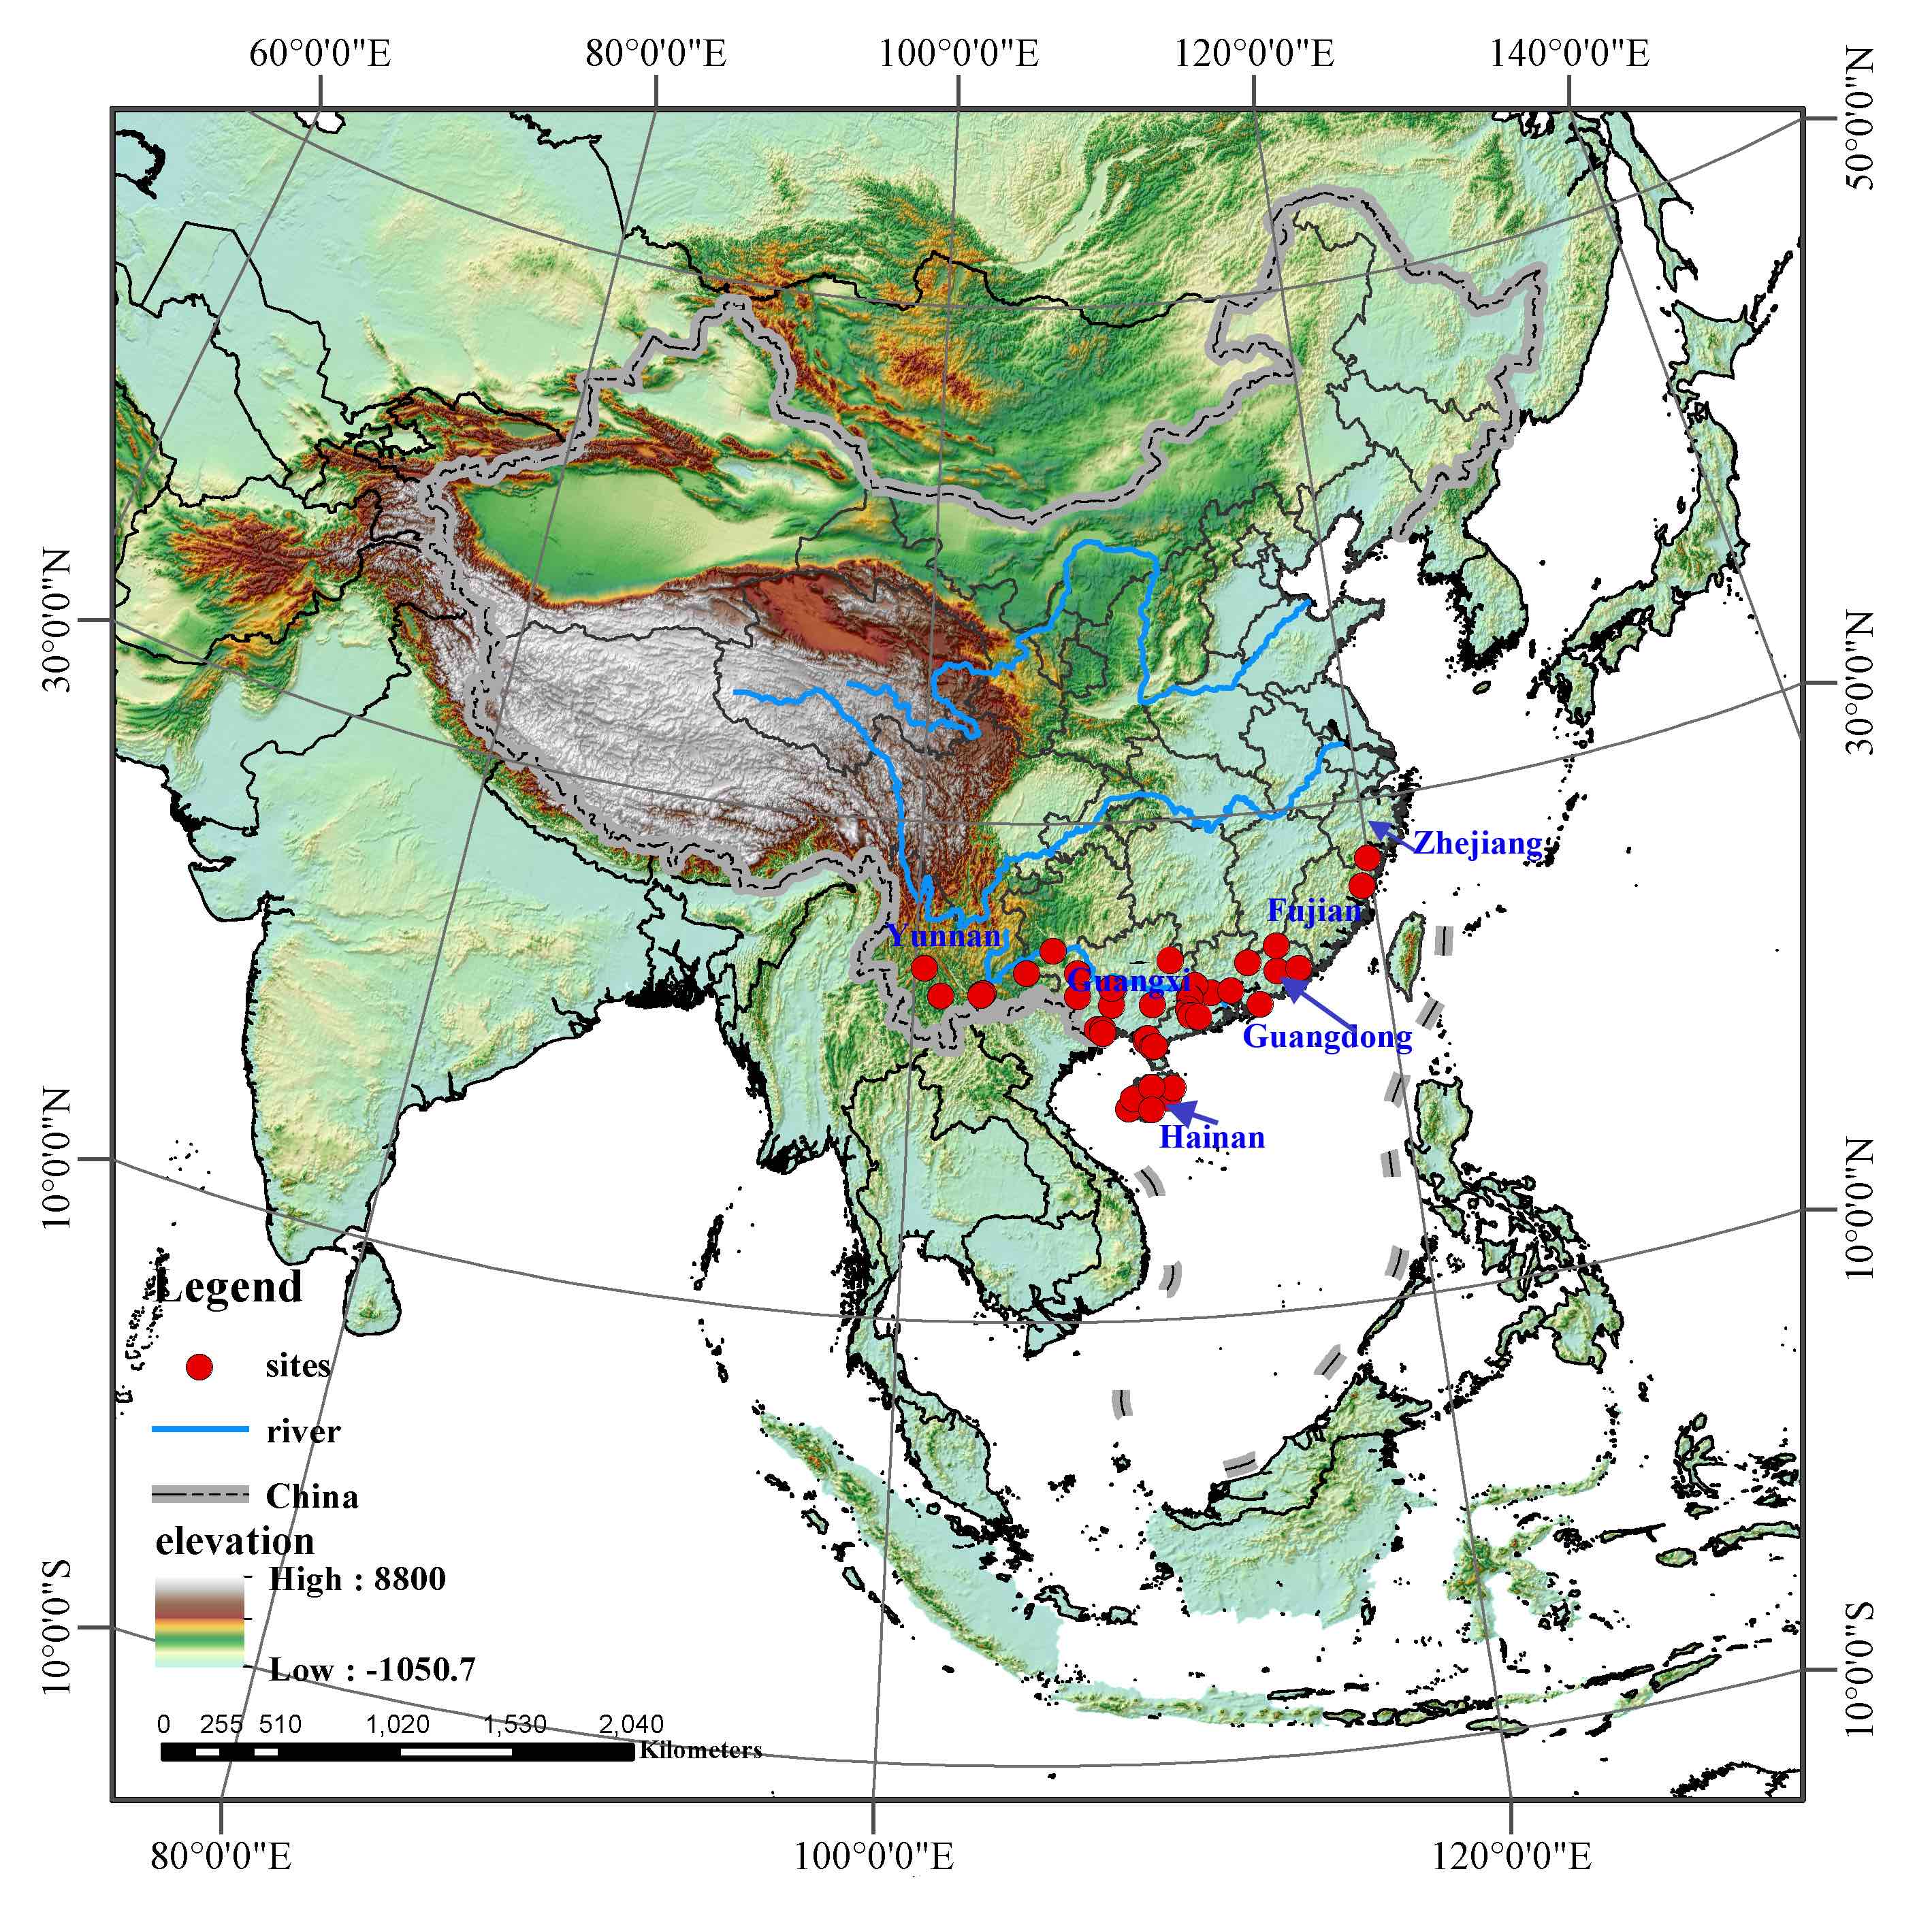

Supplement: s1 [file s1 › Figure S1--The collection geographical range of Cassytha filiformis and its hosts in China.jpg]
